# Supplementary material
Source: publisher figshare collection journal article supplement (https://gsapubs.figshare.com/articles/dataset/_/24052854)
Supplement: Supplementary file 1 [file 1]

Cole, S.R., et al., 2023, Calcite-aragonite seas as a driver of echinoderm evolution? Experimental insight and deep-time decoupling: *Geology*, <https://doi.org/10.1130/G51444.1>

## Supplemental Material

Experimental Methods  
Paleobiological Methods  
Supplemental Figure S1  
Supplemental Figure S2  
Supplemental Figure S3  
Supplemental Table S1  
Supplemental Table S2  
Supplemental Table S3  
Supplemental References  
Associated Data Files

## *Supplemental Materials for*

## Calcite-aragonite seas as a driver of echinoderm evolution?

## Experimental insight and deep-time decoupling

**Selina R. Cole<sup>1,2</sup>, David F. Wright<sup>1,2</sup>, and Jeffrey R. Thompson<sup>3,4</sup>**

<sup>1</sup>*Sam Noble Museum, University of Oklahoma, 2401 Chautauqua Avenue, Norman, OK, 73072, USA*

<sup>2</sup>*School of Geosciences, University of Oklahoma, 100 E Boyd Street, Norman, OK, 73019, USA*

<sup>3</sup>*School of Biological Sciences, University of Southampton, University Road, Southampton, SO17 1BJ United Kingdom*

<sup>4</sup>*School of Ocean and Earth Science, University of Southampton, National Oceanography Centre, European Way, Southampton, SO14 3ZH.*

## **Supplemental Materials**

Experimental Methods

Paleobiological Methods

Supplemental Figures and Tables

Supplemental Figure S1

Supplemental Figure S2

Supplemental Figure S3

Supplemental Table S1

Supplemental Table S2

Supplemental Table S3

Supplemental References

## **Associated Data Files**

Data files are deposited on Figshare (<https://gsapubs.figshare.com/Geology>).

1. Ophiuroid\_data.csv – Arm measurement data from ophiuroid regeneration experiments
2. PBDB\_output.txt – Raw echinoderm diversity data from the Paleobiology Database ([www.paleobiodb.org](http://www.paleobiodb.org))
3. Echinoderm\_diversification\_results.txt – Measures of echinoderm diversity through time calculated from PBDB\_output.txt.

## Experimental Methods

### Selection and verification of Mg/Ca ratios

The three seawater Mg/Ca treatments used for the regeneration experiment were selected based on the range of Mg/Ca ratios that echinoderms have been exposed to throughout their evolutionary history (Cambrian-Present). The highest ratio of 5.2 mol Mg/Ca reflects the composition of modern seawater and the maximum Mg/Ca ratios experienced by echinoderms throughout their evolutionary history. The low ratio of 1.7 mol Mg/Ca used in the experiment is likely higher than the minimum Mg/Ca ratios experienced by echinoderms, because revised Mg/Ca curves for the Phanerozoic indicate ratios dropped as low as 0.7 mol Mg/Ca during the Cretaceous (Hardie, 1996; Dickson, 2004). However, from preliminary results during experimental setup, we found that seawater Mg/Ca ratios at or below a ratio of approximately 1.5 resulted in considerable stress to test specimens, as evidenced by extensive autotomization of the arms. These results are consistent with those of Kolbuk et al. (2021), who found that the brittle star *Ophiocoma nigr*a experienced arm autotomization and disc perforation when cultured in seawater with a Mg/Ca ratio of ~1.5. As a result, a ratio of 1.7 mol Mg/Ca was selected for the lowest seawater treatment, which did not induce arm autotomization or disc perforation. The intermediate treatment of 2.5 mol Mg/Ca reflects seawater chemistry that falls between endmembers, which was reached at several intervals in echinoderm history such as the mid-Carboniferous, Early Permian, and mid-Jurassic.

Seawater treatments were created using formulas from J.B. Ries (2005; personal communication, 2013) by combining reagent grade chemicals measured by weight with distilled, deionized water (Table S1). Mg/Ca ratios used in the treatments were verified as being within  $\pm 0.2$  mol of the target ratio using a Perkin-Elmer Optima 4300DV Inductively Coupled Plasma Optical Emission Spectrometer. Geochemical verification was conducted at The Ohio State University, School of Earth Sciences.

### Experimental setup and conditions

*Ophioderma cinereum* is a common shallow-water ophiuroid distributed throughout the Gulf of Mexico and Western Central Atlantic. Specimens of *O. cinereum* were acquired from a commercial saltwater aquaria supplier. Other than variations in Mg/Ca ratios, all other variables

were held constant for all aquaria and specimens throughout the duration of the experiment, including tank size (10 gallons), temperature ( $25^{\circ}\text{C} \pm 1^{\circ}\text{C}$  measured twice a week), pH ( $8.1 \pm 0.1$  measured twice a week), salinity (35 ppt measured twice a week), substrate (2 cm deep aragonite sand), feedings (2-3 fishmeal pellets per individual three times per week), and water changes (10% every two weeks).

After random assignment of individual specimens to the three different experimental treatments, specimens were given a minimum 1-month acclimation period prior to beginning the experimental study. Some specimens had longer acclimation periods (up to ~2 months), but all specimens were randomly assigned to tanks and treatments, such that no tank or treatment had specimens with consistently shorter or longer acclimation periods. As a result, it is very unlikely that any observed differences in regeneration rates were due to acclimation time and/or shock. To simulate sublethal predation, an arm was removed from each individual at the junction between the sixth and seventh rows of arm plates, which allowed the position of arm removal to be held constant across specimens.

### **Data collection and sensitivity tests of experimental results**

Measurements of regenerating arms were collected by photographing specimens on a 1 mm grid while underwater, and regenerated arm length was then determined from photos using ImageJ (Schneider et al., 2012). Specimens were identified by marking the arms with a nontoxic paint marker, and separate growth records were maintained for each individual.

Because it is possible that larger individuals may be able to grow or regenerate lost limbs more quickly compared to smaller individuals, we investigated whether body size was a confounding factor. We evaluated the potential effect of body size on growth rate by comparing disc diameter to the total length of the regenerated arm for each specimen. Spearman's rank correlation between disc diameter and total regenerated arm length detects no statistically significant relationship between body size and growth rate (Spearman's  $R_{\text{oh}}=0.29$ ,  $p=0.31$ ), eliminating the concern that results are biased by differences in body size (Fig. S1).

To evaluate the sensitivity of the ANOVA test results presented in the main text, we also conducted a repeated measures nested ANOVA to account for Mg/Ca ratio treatments replicated across multiple aquarium tanks. Results of this analysis also found statistically significant differences among experimental Mg/Ca ratio treatments ( $F=36.26$ ,  $df=2$ , and  $p=0.0004$ ), and is

therefore concordant with results and conclusions presented in the main text. In addition to the Bonferroni correction for evaluating differences between experimental treatments (discussed in the main text), we also used a Tukey test of honest significant differences (HSD). Results of the Tukey HSD test found statistically significant differences ( $p < 0.00001$ ) among all pairwise comparisons of experimental treatments.

## **Paleobiological methods**

To evaluate whether changes in Mg/Ca ratios had an impact on echinoderm diversification, we calculated rank-based correlations (Spearman's Rho) across first differences between Mg/Ca ratios and temporal patterns of genus-level diversification, and then used Mann-Whitney U tests to evaluate whether diversification dynamics differ during times of calcite vs. aragonite seas.

All fossil echinoderm occurrence data spanning the Cambrian through Neogene were downloaded from Paleobiology Database (<https://paleobiodb.org>, accessed October 2021), resulting in a raw dataset of 25,037 occurrences. Taxa of uncertain taxonomic ranks or affinities were excluded, resulting in a total of 21,852 occurrences used in our analyses. To ensure our results were not dependent on a specific method or interpretation of echinoderm biodiversity, we used multiple approaches to quantify genus-level diversity dynamics. The first approach used sampled-in-bin-diversity, which simply reflects raw counts of taxa within each time bin and is one of the most commonly-used methods for calculating paleontological diversity (Miller and Foote, 1996; Kocsis et al., 2018). We also applied sampling standardization using shareholder quorum subsampling (SQS; Alroy, 2010a, 2010b), a coverage-based technique that uses a frequency distribution coverage of taxa to draw collections such that a target frequency (i.e., a “shareholder quorum”) is obtained. For the SQS analysis, we used a shareholder quorum of 0.6. In addition to quantifying changes in standing diversity, we also calculated per-capita rates of origination and extinction for each stage (Foote, 1999, 2000) to test whether Mg/Ca ratios are correlated with aspects of diversification dynamics, including extinction and net diversification (defined as the origination rate minus the extinction rate).

As is the case for essentially all taxonomic groups, occurrence data from the Paleobiology Database are incomplete for echinoderm taxa. As a result, the timeseries analyses of echinoderm diversity are subject to potential issues of patchy data entry and/or taxonomic worker bias (e.g.,

taxonomic or temporal asymmetries in efforts to document echinoderm biodiversity and/or enter it into the PBDB), as well as possible differences in the efficacy of various methods for calculating biodiversity patterns and their underlying dynamics themselves (e.g., Kocsis et al, 2018). Nevertheless, the PBDB dataset used here represents the highest-resolution compilation of Phanerozoic echinoderm data that has been constructed to date. We consider these data to be appropriate at the vast temporal and taxonomic scales of the present study, as we are seeking to evaluate broad biodiversity patterns over broad taxonomic and temporal scales spanning the Phanerozoic rather than asking questions about specific interval-to-interval changes or requiring accurate higher-level taxonomic affinities. Regardless of these caveats, we emphasize the results of our study do not depend on how diversity dynamics are calculated, as we find no relationship between Mg/Ca ratios and biodiversity patterns regardless of methodology or whether mass extinction events are included or excluded (Figs. S2-S3)

To evaluate the sensitivity of our results to the specific model of Phanerozoic Mg/Ca ratios presented by Stanley and Hardie (1998), we conducted additional analyses using Phanerozoic Mg/Ca ratios from both Wilkinson and Algeo (1989) and Horita et al. (2002). Results of these analyses also show no relationship between echinoderm biodiversity and Phanerozoic Mg/Ca ratios (Tables S2-S3). Thus, our results are robust across alternative models of Phanerozoic Mg/Ca ratios.

## Supplemental Figures and Tables

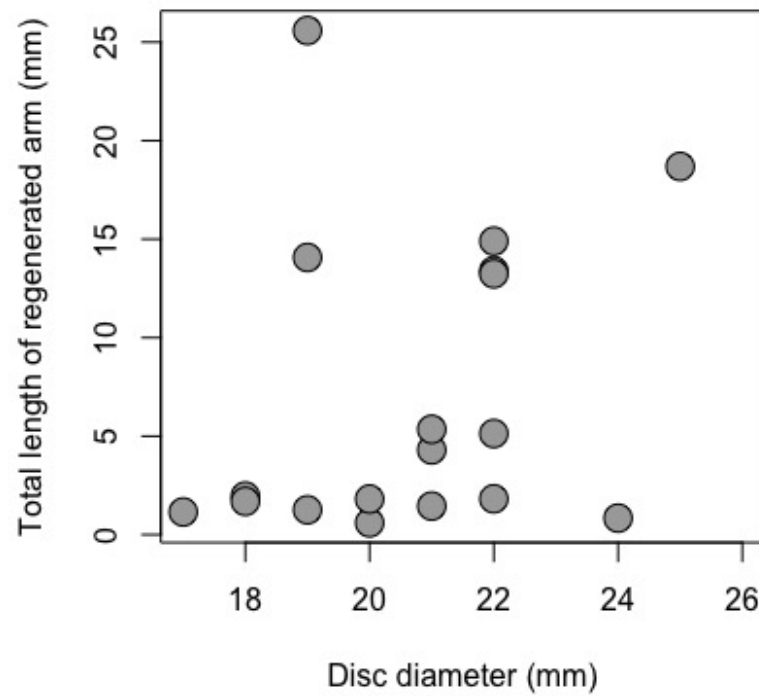

**Figure S1.** Body size, as measured by disc diameter, does not have a significant effect on total regenerated arm growth in *Ophioderma cinereum* (Spearman's  $Rho=0.29$ ,  $p=0.31$ ).

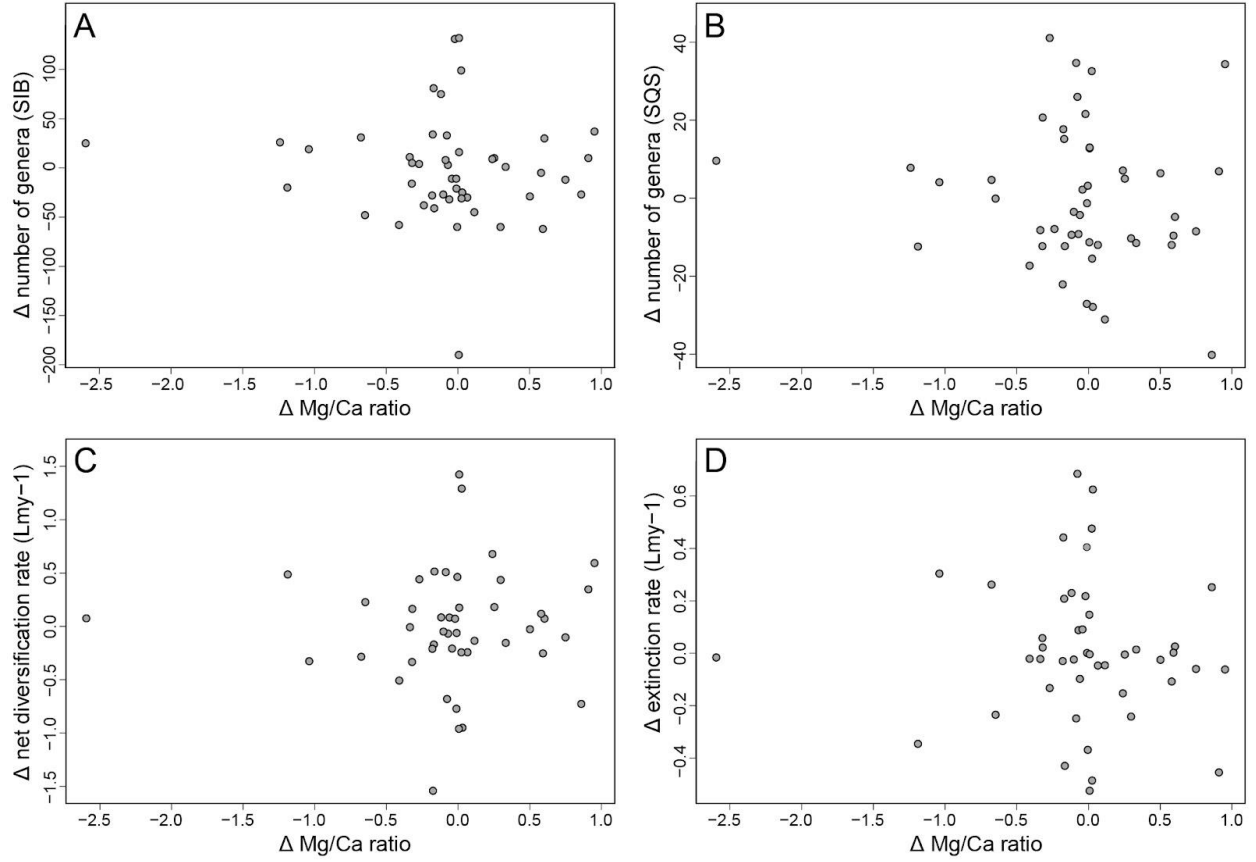

**Figure S2.** First differences of time series data comparing changes in Mg/Ca ratios to diversification dynamics. (A) Mg/Ca ratios vs. sampled-in-bin (SIB) standing diversity (Spearman's  $\rho=-0.111$ ,  $p=0.457$ ). (B) Mg/Ca ratios vs. shareholder quorum subsampling (SQS) standing diversity (Spearman's  $\rho=-0.131$ ,  $p=0.379$ ). (C) Mg/Ca ratios vs. net diversification (Spearman's  $\rho=-0.106$ ,  $p=0.488$ ). (D) Mg/Ca ratios vs. change in extinction rate (Spearman's  $\rho=-0.145$ ,  $p=0.339$ ).



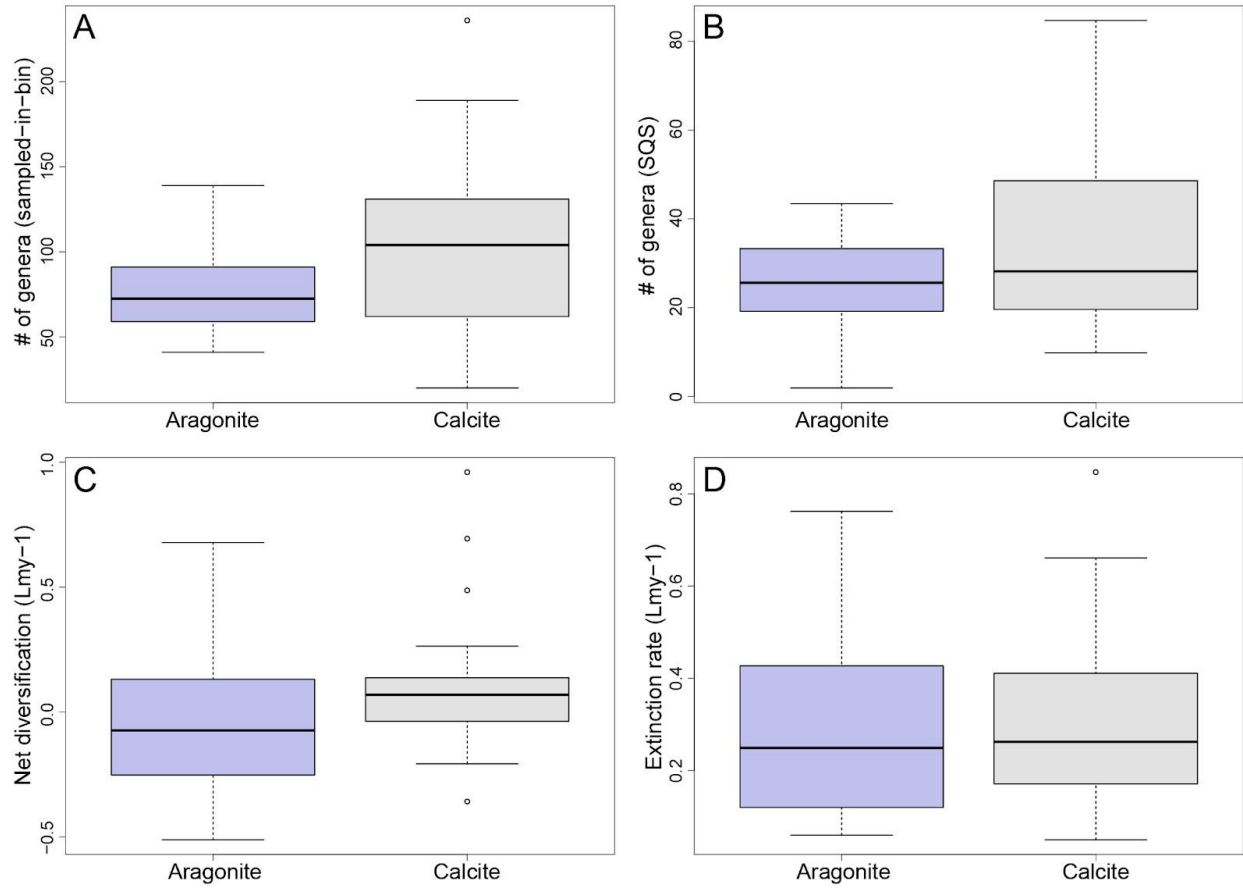

**Figure S3.** Boxplots comparing measures of standing diversity, net diversification, and extinction in calcite sea intervals versus aragonite sea intervals; Mann-Whitney U tests recover no statistically significant differences in diversity and extinction measures between seawater chemistry regimes. (A) Sampled-in-bin standing diversity in calcite versus aragonite sea intervals (with mass extinctions:  $W=154.5$ ,  $p=0.161$ , without mass extinctions:  $W=134$ ,  $p=0.178$ ). (B) Shareholder quorum subsampling (SQS) standing diversity in calcite versus aragonite sea intervals (with mass extinctions:  $W=156.5$ ,  $p=0.177$ , without mass extinctions:  $W=131.5$ ,  $p=0.156$ ). (C) Net diversification per lineage million years ( $Lmy^{-1}$ ) in calcite versus aragonite sea intervals (with mass extinctions:  $W=209$ ,  $p=0.738$ , without mass extinctions:  $W=122.5$ ,  $p=0.128$ ). (D) Extinction rate per lineage million years in calcite versus aragonite sea intervals (with mass extinctions:  $W=161.5$ ,  $p=0.364$ , without mass extinctions:  $W=182.5$ ,  $p=1.0$ ).

**Table S1.** Weights of reagent grade chemicals used to generate 14 L of each of the three seawater treatments with varying Mg/Ca ratios. Formulas are modified from Ries (2005; personal communication, 2013).

| Chemical compounds                    | 1.7 Mg/Ca ratio treatment (grams) | 2.5 Mg/Ca ratio treatment (grams) | 5.2 Mg/Ca ratio treatment (grams) |
|---------------------------------------|-----------------------------------|-----------------------------------|-----------------------------------|
| NaCl                                  | 349.2330                          | 349.2097                          | 349.3710                          |
| Na <sub>2</sub> SO <sub>4</sub>       | 58.5023                           | 58.4984                           | 58.5254                           |
| KCl                                   | 9.8817                            | 9.8811                            | 9.8857                            |
| NaHCO <sub>3</sub>                    | 2.8609                            | 2.8607                            | 2.8620                            |
| KBr                                   | 1.4304                            | 1.4304                            | 1.4310                            |
| H <sub>3</sub> BO <sub>3</sub>        | 0.3795                            | 0.3795                            | 0.3797                            |
| NaF                                   | 0.0438                            | 0.0438                            | 0.0438                            |
| SrCl <sub>2</sub> • 6H <sub>2</sub> O | 0.3503                            | 0.3503                            | 0.3505                            |
| MgCl <sub>2</sub> • 6H <sub>2</sub> O | 121.8798                          | 133.9959                          | 157.4097                          |
| CaCl <sub>2</sub> • 2H <sub>2</sub> O | 51.8171                           | 38.7586                           | 21.8900                           |
| H <sub>2</sub> O                      | 14000                             | 14000                             | 14000                             |
| <b>Total weight (grams):</b>          | <b>14596.3788</b>                 | <b>14595.4083</b>                 | <b>14602.1487</b>                 |

**Table S2.** Statistical results for first differences of time series data comparing changes in Mg/Ca ratios to diversification dynamics. SIB = Sampled-in-bin diversity, SQS = shareholder quorum subsampling diversity.

| Mg/Ca ratio model          | Biodiversity metric | Spearman's rho | <i>p</i> -value |
|----------------------------|---------------------|----------------|-----------------|
| Stanley and Hardie (1998)  | SIB                 | -0.111         | 0.457           |
| Stanley and Hardie (1998)  | SQS                 | -0.131         | 0.379           |
| Stanley and Hardie (1998)  | Net diversification | -0.106         | 488             |
| Stanley and Hardie (1998)  | Extinction rate     | -0.145         | 0.339           |
| Wilkinson and Algeo (1989) | SIB                 | 0.037          | 0.803           |
| Wilkinson and Algeo (1989) | SQS                 | 0.361          | 0.81            |
| Wilkinson and Algeo (1989) | Net diversification | -0.275         | 0.07            |
| Wilkinson and Algeo (1989) | Extinction rate     | 0.235          | 0.12            |
| Horita et al. (2002)       | SIB                 | -0.15          | 0.315           |
| Horita et al. (2002)       | SQS                 | -0.09          | 0.547           |
| Horita et al. (2002)       | Net diversification | -0.093         | 0.545           |
| Horita et al. (2002)       | Extinction rate     | 0.052          | 0.736           |

**Table S3.** Statistical results of Mann-Whitney U tests comparing biodiversity metrics in calcite seas versus aragonite seas. SIB = Sampled-in-bin diversity, SQS = shareholder quorum subsampling diversity, ME = mass extinction intervals.

| <b>Mg/Ca ratio model</b>   | <b>Biodiversity metric</b> | <b>Test statistic (TS)</b> | <b><i>p</i>-value</b> | <b>TS (ME excluded)</b> | <b><i>p</i>-value (ME excluded)</b> |
|----------------------------|----------------------------|----------------------------|-----------------------|-------------------------|-------------------------------------|
| Stanley and Hardie (1998)  | SIB                        | 154.5                      | 0.161                 | 134                     | 0.178                               |
| Stanley and Hardie (1998)  | SQS                        | 156.5                      | 0.177                 | 131.5                   | 0.156                               |
| Stanley and Hardie (1998)  | Net diversification        | 209                        | 0.738                 | 122.5                   | 0.128                               |
| Stanley and Hardie (1998)  | Extinction rate            | 161.5                      | 0.364                 | 182.5                   | 1                                   |
| Wilkinson and Algeo (1989) | SIB                        | 214                        | 0.556                 | 254.5                   | 0.11                                |
| Wilkinson and Algeo (1989) | SQS                        | 226                        | 0.811                 | 201.5                   | 0.871                               |
| Wilkinson and Algeo (1989) | Net diversification        | 201.5                      | 0.871                 | 120.5                   | 0.063                               |
| Wilkinson and Algeo (1989) | Extinction rate            | 221                        | 0.637                 | 196                     | 0.823                               |
| Horita et al. (2002)       | SIB                        | 149.5                      | 0.234                 | 139.5                   | 0.409                               |
| Horita et al. (2002)       | SQS                        | 149                        | 0.223                 | 147                     | 0.545                               |
| Horita et al. (2002)       | Net diversification        | 140.5                      | 0.278                 | 107                     | 0.19                                |
| Horita et al. (2002)       | Extinction rate            | 211.5                      | 0.389                 | 169.5                   | 0.64                                |

## Supplemental References

- Alroy, J., 2010a, The shifting balance of diversity among major marine animal groups: *Science*, v. 329, p. 1191–1194, doi:10.1126/science.1189910.
- Alroy, J., 2010b, Geographical, environmental and intrinsic biotic controls on Phanerozoic marine diversification: *Palaeontology*, v. 53, p. 1211–1235, doi:10.1111/j.1475-4983.2010.01011.x.
- Dickson, J.A.D., 2004, Echinoderm skeletal preservation: calcite-aragonite seas and the Mg/Ca ratio of Phanerozoic oceans: *Journal of Sedimentary Research*, v. 74, p. 355–365, doi:10.1306/112203740355.
- Foote, M., 1999, Morphological diversity in the evolutionary radiation of Paleozoic and post-Paleozoic crinoids: *Paleobiology*, v. 25, p. 1–115.
- Foote, M., 2000, Origination and extinction components of taxonomic diversity: general problems: *Paleobiology*, v. 26, p. 74–102, doi:10.1017/S0094837300020236.
- Hardie, L.A., 1996, Secular variation in seawater chemistry: an explanation for the coupled secular variation in the mineralogies of marine limestones and potash evaporites over the past 600 Myr: *Geology*, v. 24, p. 279–283, doi:10.1130/0091-7613(1996)024<0279:SVISCA>2.3.CO;2.
- Horita, J., Zimmermann, H., and Holland, H.D., 2002, Chemical evolution of seawater during the Phanerozoic: Implications from the record of marine evaporites: *Geochimica et Cosmochimica Acta*, v. 66, p. 3733 – 3756, doi: 10.1016/S0016-7037(01)00884-5.
- Kocsis, Á.T., Reddin, C.J., Alroy, J., and Kiessling, W., 2019, The R package divDyn for quantifying diversity dynamics using fossil sampling data. *Methods in Ecology and Evolution*, v. 10, p.735–743, doi:10.1111/2041-210X.13161.
- Kołbuk, D., Dubois, P., Stolarski, J., and Gorzelak, P., 2021, Impact of seawater  $\text{Mg}^{2+}/\text{Ca}^{2+}$  on Mg/Ca of asterozoan skeleton – Evidence from culturing and the fossil record: *Chemical Geology*, v. 584, 120557, doi:10.1016/j.chemgeo.2021.120557.
- Miller, A.I., and Foote, M., 1996, Calibrating the Ordovician radiation of marine life: implications for Phanerozoic diversity trends: *Paleobiology*, v. 22, p. 304–309,

doi:10.1017/S0094837300016237.

- Ries, J.B., 2005, Aragonite production in calcite seas: effect of seawater Mg/Ca ratio on the calcification and growth of the calcareous alga *Penicillus capitatus*: *Paleobiology*, v. 31, p. 445–458, doi:10.1666/0094-8373(2005)031[0445:APICSE]2.0.CO;2.
- Schneider, C.A., Rasband, W.S., and Eliceiri, K.W., 2012, NIH Image to ImageJ: 25 years of image analysis: *Nature Methods*, v. 9, p. 671–675, doi:10.1038/nmeth.2089.
- Stanley, S.M., and Hardie, L.A., 1998, Secular oscillations in the carbonate mineralogy of reef-building and sediment-producing organisms driven by tectonically forced shifts in seawater chemistry: *Palaeogeography, Palaeoclimatology, Palaeoecology*, v. 144, p. 3–19, doi:10.1016/S0031-0182(98)00109-6.
- Wilkinson, B.H., and Algeo, T.J., 1989, Sedimentary carbonate record of calcium-magnesium cycling: *American Journal of Science*, v. 289, p. 1158–1194, doi: 10.2475/ajs.289.10.1158.
